# Supplementary material for: A first trimester prediction model and nomogram for gestational diabetes mellitus based on maternal clinical risk factors in a resource-poor setting
Source: Springer Nature journal article supplement (doi:10.1186/s12884-024-06519-7), 2024-05-06

**Points**

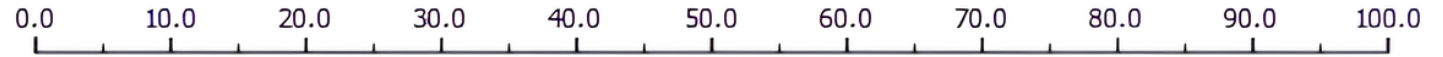

First-trimester BMI

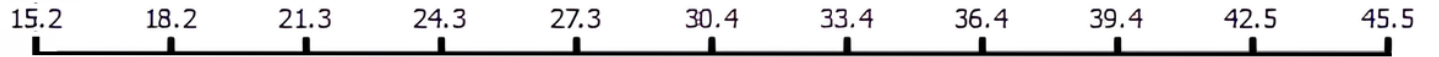

First-degree Relative with DM

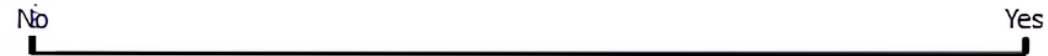

Age

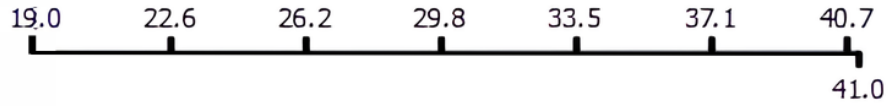

History of Foetal macrosomia

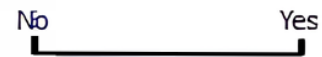

**Total**

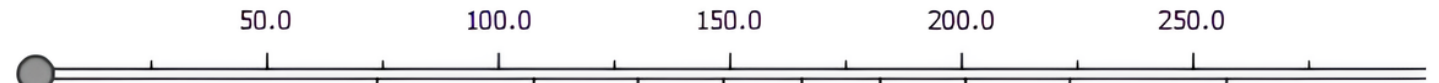

**Probabilities (%)**

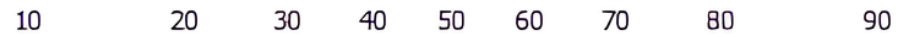

Supplement: MOESM1 [file 27061136]
